# Supplementary material for: Natural variation in macrophage polarization and function impact pneumocyte senescence and susceptibility to fibrosis
Source: publisher site journal article supplement (doi:10.18632/aging.204309), 2022-09-28
Supplement: Supplementary file [file aging-v14i19-204309-supplementary-material-SD1.pdf]

## SUPPLEMENTARY FIGURES

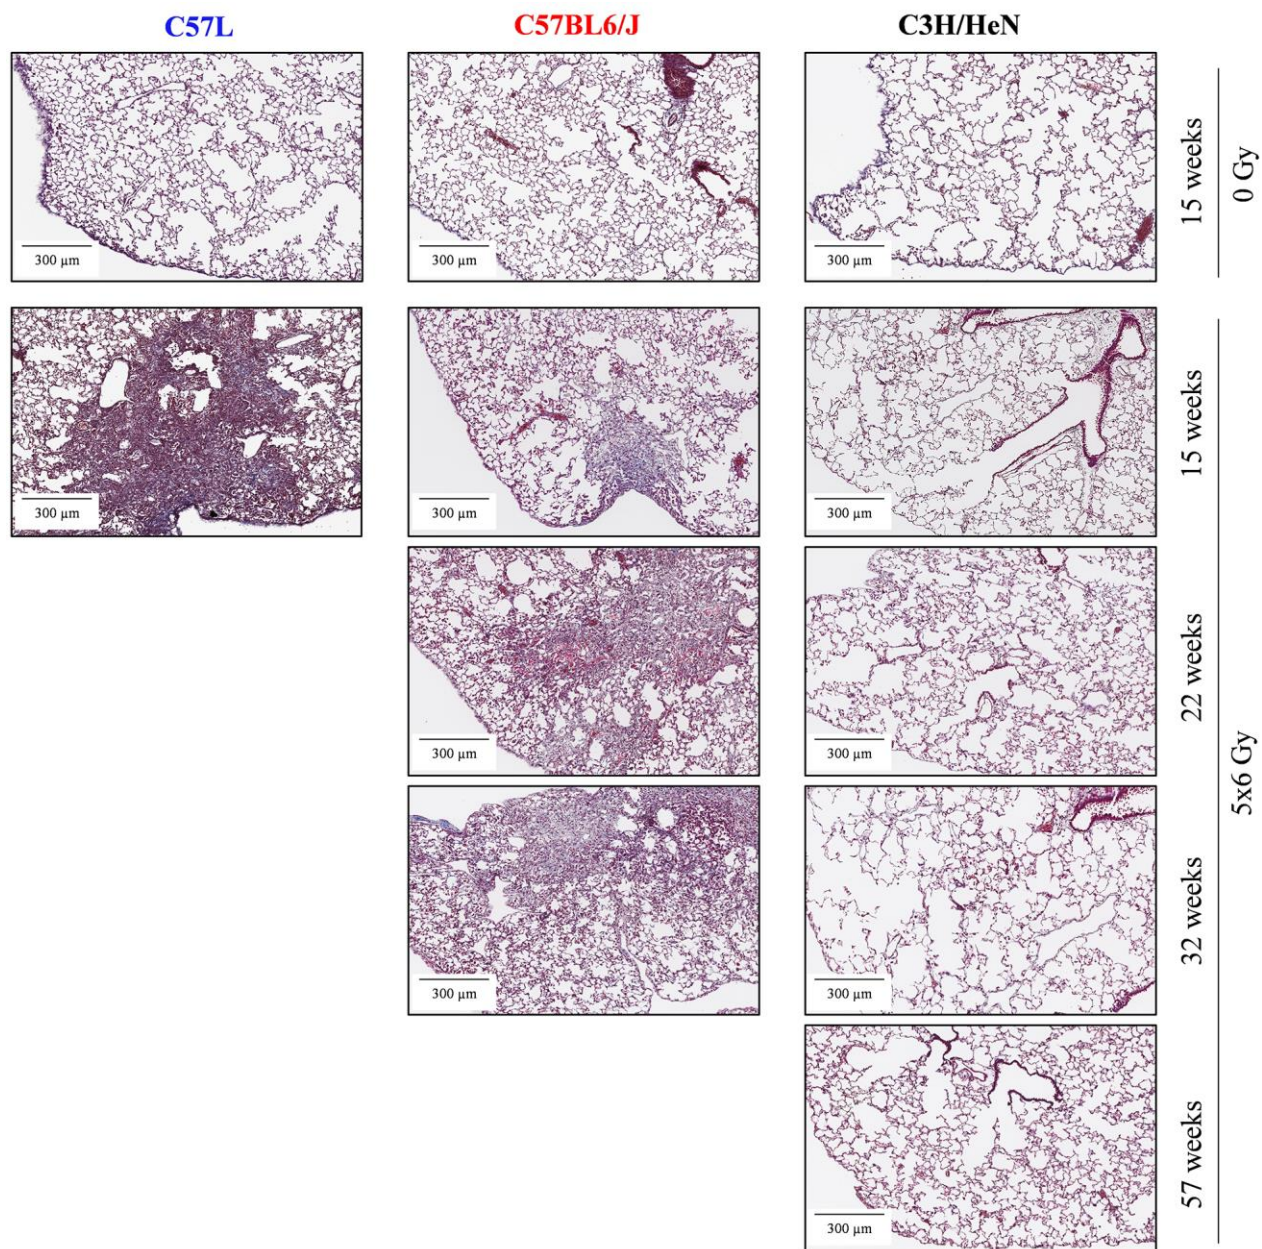

**Supplementary Figure 1. Fibrotic regions of lung after thoracic radiation.** C57L, C57BL6/J and C3H/HeN mice were exposed to 5 daily fractions of 6 Gy (5x6 Gy) of thoracic irradiation. To determine fibrotic regions, sections of lung from each strain collected at the time points were subjected to Masson Trichrome staining.

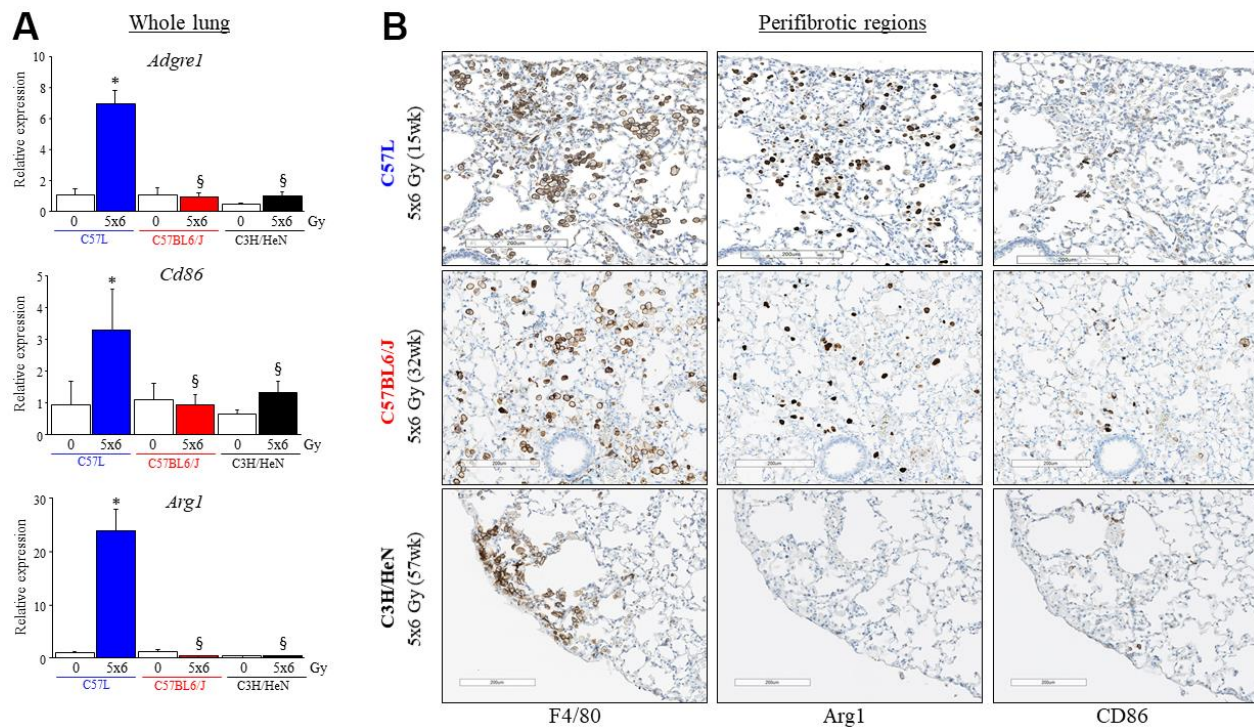

**Supplementary Figure 2. Determination of different types of macrophages in mouse lungs.** C57L, C57BL6/J and C3H/HeN mice were exposed to 5 daily fractions of 6 Gy (5x6 Gy) of thoracic irradiation. At 15, 32 and 57 weeks after irradiation, lung tissues were collected for further assays. **(A)** RNA was isolated from lung tissues and analyzed with QPCR to compare the expression of M1, and M2 macrophage markers (total: *Adgre1*, M1: *Cd86*, M2: *Arg1*). Relative changes of each marker were normalized to  $\beta$ -actin. **(B)** The expression of F4/80, CD86 and Arginase-1 (brown) was detected with immunohistochemistry with hematoxylin counterstaining (nuclei, blue) in perifibrotic regions of lung. Representative images are presented. Columns: mean, error bars: +SD, \* $p < 0.05$  for comparison to lung with 0 Gy. § $p < 0.05$  for comparison to C57L lung exposed to 5x6 Gy by ANOVA with Tukey's correction.

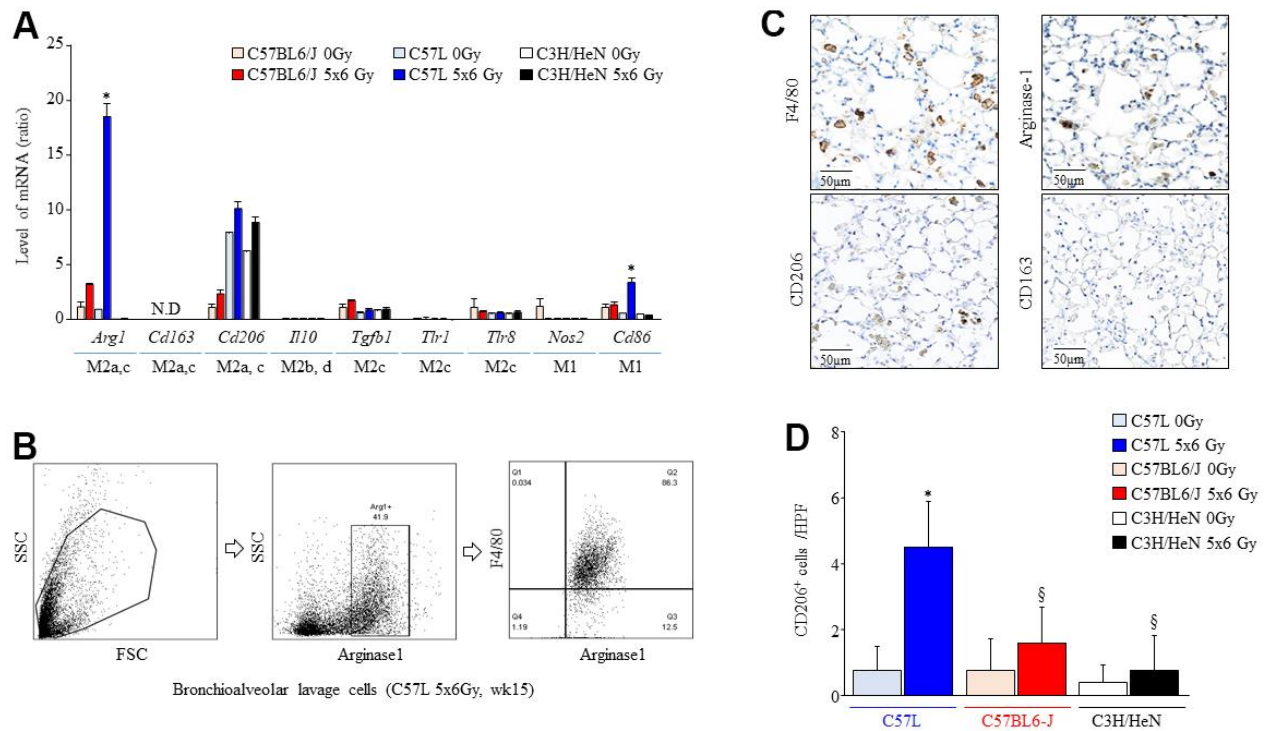

**Supplementary Figure 3. Characterization of macrophages in bronchioalveolar lavage fluid from three strains.** C57L, C57BL6/J and C3H/HeN mice were exposed to 5 daily fractions of 6 Gy (5x6 Gy) of thoracic irradiation. At 15 weeks after irradiation, mononuclear cells were collected from bronchioalveolar lavage fluid ( $n \geq 5$  mice per condition). **(A)** RNA was isolated from bronchioalveolar cells and analyzed with QPCR to compare the expression of M1, and M2 macrophage markers. Relative changes of each marker were normalized to  $\beta$ -actin. **(B)** Expression of F-4/80 and Arginase-1 was assessed by flow cytometric assay in bronchioalveolar cells. **(C)** The expression of F4/80, Arginase-1 and CD206 (brown) was detected with immunohistochemistry with hematoxylin counterstaining (nuclei, blue) in lung. Representative images are presented. **(D)** The numbers of CD206+ cells were scored in whole lung. Columns: mean, error bars: +SD, \* $p < 0.05$  for comparison to lung with 0 Gy. § $p < 0.05$  for comparison to C57L lung exposed to 5x6 Gy by ANOVA with Tukey's correction.

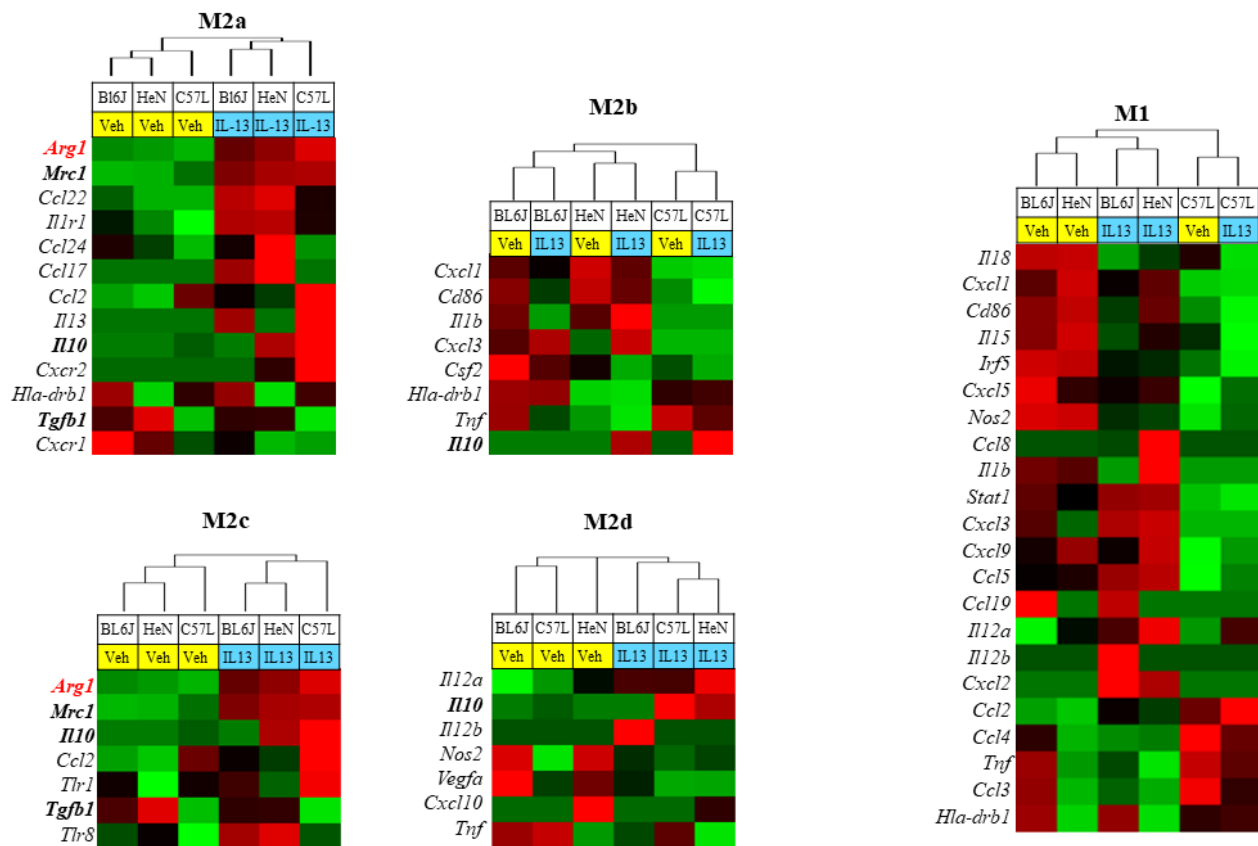

**Supplementary Figure 4. Characterization of macrophage phenotype across mouse strains after exposure to IL-13.** Bone marrow derived macrophages from each strain were polarized with vehicle (PBS) or IL-13 (10 ng/ml). After 3 days of exposure, total RNA was isolated. The expression of genes related to M1 and M2 polarization was evaluated in macrophages treated with vehicle or IL-13 using the NanoString nCounter Gene Expression Assay and a custom code set. Unsupervised hierarchical clustering of genes relating to each polarization subtype was performed.
