# Supplementary material for: Natural variation in macrophage polarization and function impact pneumocyte senescence and susceptibility to fibrosis
Source: publisher site journal article supplement (doi:10.18632/aging.204309), 2022-09-28
Supplement: Supplementary file [file aging-v14i19-204309-supplementary-material-SD2.pdf]

## SUPPLEMENTARY TABLES

**Supplementary Table 1. NanoString code set.**

| Gene name (HUGO)        | Accession   | Position  | Target sequence                                                                                           |
|-------------------------|-------------|-----------|-----------------------------------------------------------------------------------------------------------|
| ARG1                    | NM_000045.3 | 674-773   | TCAATGACTGAAGTGGACAGACTAGGAATTGGCAAGGTGATGGAAGAAACACT<br>CAGCTATCTACTAGGAAGAAAAGAAAAGGCCAATTCATCTAAGTTTTG |
| CCL17                   | NM_002987.2 | 230-329   | GCCTGGAGTACTTCAAGGGAGCCATTCCCCTTAGAAAAGCTGAAGACGTGGTACC<br>AGACATCTGAGGACTGCTCCAGGGATGCCATCGTTTTTGTAACTGT |
| CCL2                    | NM_002982.3 | 124-223   | CATTCCCCAAGGGCTCGCTCAGCCAGATGCAATCAATGCCCCAGTCACCTGCTGT<br>TATAACTTCACCAATAGGAAGATCTCAGTGCAGAGGCTCGCGAGC  |
| CCL22                   | NM_002990.3 | 798-897   | CTCGCCCAAGCAGCTGGTAATTCATTTTCATGTATTAGATGTCCCCTGGCCCTCT<br>GTCCCCTCTTAATAACCCTAGTCACAGTCTCCGCAGATTCCTGGG  |
| CCL24                   | NM_002991.2 | 19-118    | ATAGTAACCAGCCTTCTGTTCCTTGGTGTCTGTGCCACCACATCATCCCTACGG<br>GCTCTGTGGTCATCCCCTCTCCCTGCTGCATGTTCTTTGTTTCCA   |
| CXCR1                   | NM_000634.2 | 1951-2050 | GCAGCCACCAGTCCATTGGGCAGGCAGATGTTCTAATAAAAGCTTCTGTTCCTGT<br>CTTGTCCCTGTGGAAGTATCTTGGTTGTGACAGAGTCAAGGGTGT  |
| CXCR2                   | NM_001557.2 | 2056-2155 | AGGAGAAACTGGAACCTCTCGAGCGTTGCTGGGGGGGATTGTAATAAGGTGTGAC<br>CACTGCAGAAGACAGTATGGCAGCTTTCCTCAAAACTCAGACATA  |
| HLA-DRB1                | NM_002124.3 | 748-847   | AGCACGGTCTGAATCTGCACAGACAAGATGCTGAGTGGAGTCGGGGGCTTTGT<br>GCTGGGCCTGCTCTTCCTTGGGGCCGGGCTGTTTCATCTACTTCAGG  |
| IL10                    | NM_000572.2 | 231-330   | AAGGATCAGCTGGACAACCTTGTGTAAAGGAGTCCCTTGTGGAGGACTTTAAG<br>GGTTACCTGGGTTGCCAAGCCTTGTCTGAGATGATCCAGTTTTACC   |
| IL13                    | NM_002188.2 | 517-616   | TTTCTTTCTGATGTCAAAAATGTCTTGGGTAGGCGGGGAAGGAGGGTTAGGGAGG<br>GGTAAAATTCCTTAGCTTAGACCTCAGCCTGTGCTGCCGCTTCA   |
| IL1R1                   | NM_000877.3 | 583-682   | TGCTAAGGTGGAGATTTCAGGACATTACTATTGCGTGGTAAGAAATTCATCTTA<br>CTGCCTCAGAATTAATAAAGTGCAAAATTTGTGGAGAATGAGCCT   |
| MRC1                    | NM_002438.3 | 941-1040  | TGACCTCAGGACTCTGGATTGGACTTAACAGTCTGAGCTTCAACAGCGGTTGGC<br>AGTGGAGTGACCGCAGTCCCTTCCGATATTTGAACTGGTTACCAGG  |
| TGFB1                   | NM_000660.3 | 1261-1360 | TATATGTTCTTCAACACATCAGAGCTCCGAGAAGCGGTACTGAACCCGTGTTGC<br>TCTCCCGGCAGAGCTGCGTCTGCTGAGGCTCAAGTAAAAGTGG     |
| Internal reference gene | Accession   | Position  | Target sequence                                                                                           |
| CLTC                    | NM_004859.2 | CLTC      | GGGTATCAACCCAGCAAACATTGGCTTCAGTACCCTGACTATGGAGTCTGACAA<br>ATTCATCTGCATTAGAGAAAAAGTAGGAGAGCAGGCCAGGTGGTA   |
| GAPDH                   | NM_002046.3 | GAPDH     | ACTTCAACAGCGACACCCACTCTCCACCTTTGACGCTGGGGCTGGCATTGCCCT<br>CAACGACCACTTTGTCAAGCTCATTTCCTGGTATGACAACGAATT   |
| GUSB                    | NM_000181.1 | GUSB      | CGGTCGTGATGTGGTCTGTGGCCAACGAGCCTGCGTCCCACCTAGAATCTGCTG<br>GCTACTACTTGAAGATGGTGATCGCTCACACCAAATCCTTGGACCC  |
| HPRT1                   | NM_000194.1 | HPRT1     | TGTGATGAAGGAGATGGGAGGCCATCACATTGTAGCCCTCTGTGTGCTCAAGGG<br>GGGCTATAAAATCTTTGCTGACCTGCTGGATTACATCAAAGCACTG  |
| PGK1                    | NM_000291.2 | PGK1      | GCAAGAAGTATGCTGAGGCTGTCACTCGGGCTAAGCAGATTGTGTGGAATGGTC<br>CTGTGGGGTATTTGAATGGGAAGCTTTTGCCCGGGGAACCAAAGC   |
| TUBB                    | NM_178014.2 | TUBB      | TTCTAAGTATGTCCATTTCCATCTCAGCTTCAAGGGAGGTGTCAGCAGTATTAT<br>CTCCACTTCAATCTCCCTCCAAGCTCTACTCTGGAGGAGTCTGT    |

**Supplementary Table 2. Primers and probes set for TaqMan gene expression assay.**

| <b>Gene symbol</b> | <b>Target name</b> | <b>Assay ID</b> |
|--------------------|--------------------|-----------------|
| Adgre1             | F4/80              | Mm00802529_m1   |
| Arg1               | Arginase-1         | Mm00475988_m1   |
| Ccl2               | CCL2               | Mm00441242_m1   |
| Ccl17              | CCL17              | Mm01244826_g1   |
| Cd86               | CD86               | Mm00444540_m1   |
| Cybb               | NOX2               | Mm01287743_m1   |
| Il10               | IL10               | Mm99999062_m1   |
| Mrc1               | MRC1               | Mm01329359_m1   |
| Ncf1               | NCF1               | Mm00447921_m1   |
| Ncf2               | NCF2               | Mm00726636_s1   |
| Ncf4               | NCF4               | Mm00476300_m1   |
| Nox1               | NOX1               | Mm00549170_m1   |
